# Supplementary material for: Effect of the pectin contents and nanostructure on the stem straightness of two Paeonia lactiflora cultivars
Source: PeerJ. 2023 Apr 13;11:e15166. doi: 10.7717/peerj.15166 (PMC10106084; doi:10.7717/peerj.15166)
Supplement: Supplemental Information 2 [file peerj-11-15166-s002.xlsx]

## Sheet: angle of flower and branch
stage	cultivar	angle of flower and branch		stage	cultivar	angle of flower and branch
S1	Dong Fang Shao Nv'	3.5		S1	Lan Tian Piao Xiang'	5.1
S1	Dong Fang Shao Nv'	2.1		S1	Lan Tian Piao Xiang'	6.9
S1	Dong Fang Shao Nv'	3.7		S1	Lan Tian Piao Xiang'	8.3
S1	Dong Fang Shao Nv'	4.3		S1	Lan Tian Piao Xiang'	7.7
S1	Dong Fang Shao Nv'	3.5		S1	Lan Tian Piao Xiang'	5.2
S1	Dong Fang Shao Nv'	3.2		S1	Lan Tian Piao Xiang'	3.6
S2	Dong Fang Shao Nv'	5.3		S2	Lan Tian Piao Xiang'	13.9
S2	Dong Fang Shao Nv'	5.5		S2	Lan Tian Piao Xiang'	17.6
S2	Dong Fang Shao Nv'	6.9		S2	Lan Tian Piao Xiang'	20.1
S2	Dong Fang Shao Nv'	6.1		S2	Lan Tian Piao Xiang'	18.5
S2	Dong Fang Shao Nv'	5.8		S2	Lan Tian Piao Xiang'	16.9
S2	Dong Fang Shao Nv'	5.1		S2	Lan Tian Piao Xiang'	17.3
S3	Dong Fang Shao Nv'	6.7		S3	Lan Tian Piao Xiang'	22.8
S3	Dong Fang Shao Nv'	5.2		S3	Lan Tian Piao Xiang'	20.9
S3	Dong Fang Shao Nv'	6.8		S3	Lan Tian Piao Xiang'	21.9
S3	Dong Fang Shao Nv'	6.2		S3	Lan Tian Piao Xiang'	20.5
S3	Dong Fang Shao Nv'	5.7		S3	Lan Tian Piao Xiang'	21
S3	Dong Fang Shao Nv'	6.1		S3	Lan Tian Piao Xiang'	21.9
S4	Dong Fang Shao Nv'	5.8		S4	Lan Tian Piao Xiang'	29.5
S4	Dong Fang Shao Nv'	6.3		S4	Lan Tian Piao Xiang'	28.3
S4	Dong Fang Shao Nv'	6.6		S4	Lan Tian Piao Xiang'	30.1
S4	Dong Fang Shao Nv'	6.9		S4	Lan Tian Piao Xiang'	29.6
S4	Dong Fang Shao Nv'	4.1		S4	Lan Tian Piao Xiang'	27.6
S4	Dong Fang Shao Nv'	6.3		S4	Lan Tian Piao Xiang'	28.4
S5	Dong Fang Shao Nv'	5.4		S5	Lan Tian Piao Xiang'	67.1
S5	Dong Fang Shao Nv'	6.6		S5	Lan Tian Piao Xiang'	58.2
S5	Dong Fang Shao Nv'	6.8		S5	Lan Tian Piao Xiang'	73.8
S5	Dong Fang Shao Nv'	5.3		S5	Lan Tian Piao Xiang'	55.2
S5	Dong Fang Shao Nv'	5.7		S5	Lan Tian Piao Xiang'	65.3
S5	Dong Fang Shao Nv'	5.9		S5	Lan Tian Piao Xiang'	64.7

## Sheet: Water-soluble pectin
	Dong Fang Shao Nv'
stages	dry weight	A4	A3	A2	A1	WSP content（mg/g dry weight）
S1	0.0032	1.832	0.069	0.26	0.027	118.227
	0.0031	1.611	0.046			108.334
	0.0031	1.754	0.06			117.264
S2	0.0029	1.068	0.053			75.1073
	0.0028	1.081	0.048			79.1692
	0.003	1.115	0.078			74.1774
S3	0.0028	0.616	0.022			45.5242
	0.0029	0.56	0.025			39.5886
	0.0029	0.452	0.038			30.6349
S4	0.003	0.741	0.07			47.9971
	0.0028	0.672	0.036			48.7431
	0.0034	0.877	0.039			52.8907
S5	0.0028	0.521	0.025			38.0135
	0.0028	0.5	0.038			35.4077
	0.0029	0.536	0.041			36.6287
	Lan Tian Piao Xiang'
stages	dry weight	A4	A3	A2	A1		WSP content（mg/g dry weight）
S1	0.0028	0.623	0.041	0.165	0.083		126.742
	0.0029	0.828	0.052				163.162
	0.003	0.89	0.035				173.78
S2	0.0033	1.232	0.077				213.415
	0.0032	1.206	0.077				215.13
	0.003	1.249	0.061				241.463
S3	0.0028	0.598	0.03				123.693
	0.0029	0.718	0.051				140.244
	0.0031	0.62	0.037				114.673
S4	0.0033	0.385	0.037				64.3016
	0.0033	0.41	0.042				67.997
	0.0032	0.358	0.034				61.7378
S5	0.003	0.507	0.05				92.8862
	0.0033	0.509	0.035				87.5831
	0.0031	0.423	0.034				76.5146

## Sheet: CDTA-souble pectin
	Dong Fang Shao Nv'
stages	dry weight	A4	A3	A2	A1	ISP content（mg/g dry weight）
S1	0.003	1.151	0.09	0.086	0.004	215.65
	0.0028	1.061	0.087			212.108
	0.0032	1.138	0.082			201.22
S2	0.0028	0.892	0.061			180.967
	0.0029	0.85	0.041			170.101
	0.0029	0.784	0.058			152.649
S3	0.0028	0.419	0.025			85.8014
	0.0035	0.407	0.028			66.0279
	0.0029	0.394	0.039			74.6426
S4	0.0028	0.357	0.029			71.4286
	0.0034	0.391	0.032			64.3831
	0.003	0.393	0.025			74.7967
S5	0.0027	0.381	0.022			81.075
	0.0029	0.357	0.032			68.3347
	0.0031	0.412	0.013			78.4815
	Lan Tian Piao Xiang'
stages	dry weight	A4	A3	A2	A1	ISP content（mg/g dry weight）
S1	0.003	0.478	0.092	0.259	0.049	30.6349
	0.0031	0.524	0.108			31.9508
	0.0032	0.419	0.111			22.9167
S2	0.0028	0.493	0.026			39.7109
	0.0028	0.654	0.025			53.4864
	0.0029	0.426	0.028			32.6765
S3	0.0031	0.53	0.029			38.4793
	0.0032	0.679	0.034			47.9911
	0.003	0.664	0.042			49.3651
S4	0.0035	0.386	0.028			24.3537
	0.0034	0.557	0.024			37.3249
	0.0031	0.533	0.03			38.6329
S5	0.0032	0.61	0.039			42.4851
	0.0034	0.561	0.035			36.8347
	0.0031	0.636	0.031			46.467

## Sheet: Sodium carbonate-soluble pectin
	Dong Fang Shao Nv'
stages	dry weight	A4	A3	A2	A1	SSP content（mg/g dry weight）
S1	0.0031	1.368	0.061	0.12	0.038	257.081
	0.003	1.296	0.053			252.642
	0.0029	1.216	0.046			246.005
S2	0.0028	0.83	0.02			176.394
	0.0029	0.785	0.028			159.167
	0.0027	0.801	0.033			173.442
S3	0.0029	0.859	0.052			169.68
	0.003	0.713	0.016			141.667
	0.0033	0.833	0.039			146.711
S4	0.0032	1.022	0.042			186.738
	0.0035	1.118	0.045			186.934
	0.0032	1.215	0.057			220.655
S5	0.0036	0.625	0.029			100.949
	0.0031	0.563	0.037			103.462
	0.0033	0.881	0.037			155.95
	Lan Tian Piao Xiang'
stages	dry weight	A4	A3	A2	A1	SSP content（mg/g dry weight）
S1	0.0028	0.869	0.054	0.225	0.052	84.1247
	0.0029	1.018	0.08			93.4822
	0.0032	1.172	0.052			101.156
S2	0.0026	1.085	0.052			114.829
	0.003	1.182	0.073			106.84
	0.0028	1.464	0.087			142.135
S3	0.0027	0.469	0.069			42.8174
	0.0028	0.712	0.035			69.8803
	0.0028	0.436	0.041			40.7721
S4	0.0028	0.699	0.044			67.6094
	0.0035	0.563	0.049			42.4443
	0.0032	0.635	0.043			53.4682
S5	0.0028	0.58	0.043			55.4294
	0.0031	0.717	0.04			63.1177
	0.0035	0.692	0.038			54.005

## Sheet: CDTA length
Cultivar	Length		Cultivar	Length		Cultivar	Length		Cultivar	Length		Cultivar	Length
S1-D	725		S2-D	67		S3-D	37		S4-D	62		S5-D	36
S1-D	273		S2-D	79		S3-D	38		S4-D	64		S5-D	39
S1-D	354		S2-D	99		S3-D	38		S4-D	68		S5-D	45
S1-D	357		S2-D	103		S3-D	42		S4-D	76		S5-D	54
S1-D	123		S2-D	105		S3-D	43		S4-D	82		S5-D	60
S1-D	1303		S2-D	107		S3-D	53		S4-D	85		S5-D	74
S1-D	279		S2-D	112		S3-D	55		S4-D	88		S5-D	82
S1-D	488		S2-D	116		S3-D	57		S4-D	97		S5-D	82
S1-D	464		S2-D	119		S3-D	59		S4-D	104		S5-D	83
S1-D	623		S2-D	121		S3-D	59		S4-D	107		S5-D	86
S1-D	389		S2-D	121		S3-D	59		S4-D	112		S5-D	86
S1-D	160		S2-D	122		S3-D	60		S4-D	112		S5-D	90
S1-D	861		S2-D	128		S3-D	63		S4-D	112		S5-D	91
S1-D	296		S2-D	132		S3-D	64		S4-D	116		S5-D	91
S1-D	933		S2-D	135		S3-D	64		S4-D	118		S5-D	100
S1-D	277		S2-D	136		S3-D	64		S4-D	119		S5-D	109
S1-D	438		S2-D	141		S3-D	65		S4-D	119		S5-D	122
S1-D	171		S2-D	142		S3-D	65		S4-D	127		S5-D	131
S1-D	113		S2-D	145		S3-D	69		S4-D	130		S5-D	131
S1-D	201		S2-D	147		S3-D	69		S4-D	140		S5-D	136
S1-D	299		S2-D	148		S3-D	69		S4-D	158		S5-D	137
S1-D	335		S2-D	149		S3-D	70		S4-D	160		S5-D	140
S1-D	324		S2-D	149		S3-D	72		S4-D	169		S5-D	144
S1-D	220		S2-D	152		S3-D	73		S4-D	172		S5-D	145
S1-D	509		S2-D	152		S3-D	73		S4-D	186		S5-D	146
S1-D	469		S2-D	157		S3-D	75		S4-D	190		S5-D	147
S1-D	734		S2-D	159		S3-D	76		S4-D	191		S5-D	149
S1-D	610		S2-D	159		S3-D	76		S4-D	204		S5-D	151
S1-D	3560		S2-D	163		S3-D	76		S4-D	204		S5-D	155
S1-D	2183		S2-D	165		S3-D	79		S4-D	208		S5-D	160
S1-D	2271		S2-D	170		S3-D	79		S4-D	209		S5-D	162
S1-D	2300		S2-D	173		S3-D	79		S4-D	210		S5-D	165
S1-D	182		S2-D	173		S3-D	79		S4-D	212		S5-D	167
S1-D	168		S2-D	179		S3-D	83		S4-D	224		S5-D	169
S1-D	1043		S2-D	180		S3-D	83		S4-D	227		S5-D	172
S1-D	729		S2-D	185		S3-D	84		S4-D	227		S5-D	202
S1-D	1026		S2-D	186		S3-D	85		S4-D	238		S5-D	281
S1-D	607		S2-D	196		S3-D	86		S4-D	268		S5-D	289
S1-D	441		S2-D	196		S3-D	87		S4-D	268		S5-D	290
S1-D	684		S2-D	199		S3-D	90		S4-D	269		S5-L	32
S1-D	517		S2-D	203		S3-D	91		S4-D	270		S5-L	39
S1-D	969		S2-D	206		S3-D	91		S4-D	276		S5-L	45
S1-D	562		S2-D	208		S3-D	91		S4-D	285		S5-L	49
S1-D	288		S2-D	217		S3-D	91		S4-D	289		S5-L	52
S1-D	430		S2-D	217		S3-D	92		S4-D	293		S5-L	52
S1-D	262		S2-D	221		S3-D	94		S4-D	296		S5-L	54
S1-D	1709		S2-D	226		S3-D	95		S4-D	365		S5-L	57
S1-D	1017		S2-D	230		S3-D	99		S4-D	435		S5-L	58
S1-D	577		S2-D	235		S3-D	101		S4-D	445		S5-L	60
S1-D	440		S2-D	235		S3-D	102		S4-D	475		S5-L	68
S1-D	590		S2-D	237		S3-D	102		S4-D	558		S5-L	72
S1-D	1352		S2-D	239		S3-D	103		S4-D	581		S5-L	74
S1-D	700		S2-D	239		S3-D	104		S4-D	614		S5-L	85
S1-D	243		S2-D	242		S3-D	104		S4-D	798		S5-L	86
S1-D	532		S2-D	243		S3-D	107		S4-D	974		S5-L	100
S1-D	882		S2-D	250		S3-D	107		S4-L	30		S5-L	102
S1-D	423		S2-D	253		S3-D	107		S4-L	31		S5-L	102
S1-D	501		S2-D	253		S3-D	111		S4-L	36		S5-L	116
S1-D	555		S2-D	257		S3-D	115		S4-L	38		S5-L	117
S1-D	1888		S2-D	260		S3-D	116		S4-L	39		S5-L	124
S1-D	908		S2-D	264		S3-D	117		S4-L	40		S5-L	129
S1-D	709		S2-D	264		S3-D	118		S4-L	41		S5-L	129
S1-D	1029		S2-D	266		S3-D	119		S4-L	42		S5-L	156
S1-D	714		S2-D	266		S3-D	120		S4-L	42		S5-L	160
S1-D	1094		S2-D	273		S3-D	121		S4-L	45		S5-L	167
S1-D	565		S2-D	273		S3-D	121		S4-L	47		S5-L	193
S1-D	525		S2-D	277		S3-D	122		S4-L	48		S5-L	218
S1-D	530		S2-D	285		S3-D	122		S4-L	48		S5-L	225
S1-D	1515		S2-D	285		S3-D	123		S4-L	49		S5-L	371
S1-D	456		S2-D	289		S3-D	124		S4-L	49
S1-D	570		S2-D	303		S3-D	125		S4-L	49
S1-D	283		S2-D	311		S3-D	126		S4-L	49
S1-D	1603		S2-D	323		S3-D	127		S4-L	49
S1-D	1103		S2-D	330		S3-D	128		S4-L	49
S1-D	736		S2-D	335		S3-D	129		S4-L	49
S1-D	1247		S2-D	344		S3-D	129		S4-L	49
S1-D	593		S2-D	348		S3-D	131		S4-L	49
S1-D	537		S2-D	352		S3-D	133		S4-L	49
S1-D	1038		S2-D	353		S3-D	133		S4-L	50
S1-D	943		S2-D	360		S3-D	137		S4-L	50
S1-D	660		S2-D	425		S3-D	142		S4-L	54
S1-D	1475		S2-D	425		S3-D	143		S4-L	54
S1-D	292		S2-D	426		S3-D	143		S4-L	55
S1-D	1271		S2-D	516		S3-D	147		S4-L	55
S1-D	662		S2-D	569		S3-D	147		S4-L	55
S1-D	339		S2-D	611		S3-D	150		S4-L	55
S1-D	855		S2-D	643		S3-D	151		S4-L	56
S1-D	380		S2-D	655		S3-D	175		S4-L	56
S1-D	1122		S2-D	835		S3-D	185		S4-L	57
S1-L	29		S2-D	858		S3-D	186		S4-L	57
S1-L	32		S2-L	61		S3-L	39		S4-L	58
S1-L	32		S2-L	63		S3-L	40		S4-L	59
S1-L	33		S2-L	64		S3-L	41		S4-L	59
S1-L	34		S2-L	66		S3-L	41		S4-L	59
S1-L	35		S2-L	78		S3-L	44		S4-L	59
S1-L	35		S2-L	78		S3-L	48		S4-L	59
S1-L	35		S2-L	78		S3-L	49		S4-L	59
S1-L	35		S2-L	78		S3-L	49		S4-L	59
S1-L	35		S2-L	79		S3-L	50		S4-L	59
S1-L	35		S2-L	79		S3-L	50		S4-L	59
S1-L	38		S2-L	80		S3-L	50		S4-L	60
S1-L	38		S2-L	82		S3-L	51		S4-L	60
S1-L	38		S2-L	93		S3-L	52		S4-L	60
S1-L	38		S2-L	98		S3-L	53		S4-L	61
S1-L	39		S2-L	98		S3-L	53		S4-L	61
S1-L	39		S2-L	98		S3-L	55		S4-L	61
S1-L	39		S2-L	98		S3-L	55		S4-L	62
S1-L	39		S2-L	99		S3-L	55		S4-L	62
S1-L	39		S2-L	100		S3-L	55		S4-L	62
S1-L	39		S2-L	100		S3-L	58		S4-L	62
S1-L	39		S2-L	100		S3-L	59		S4-L	62
S1-L	39		S2-L	103		S3-L	59		S4-L	64
S1-L	39		S2-L	108		S3-L	61		S4-L	64
S1-L	41		S2-L	110		S3-L	61		S4-L	64
S1-L	42		S2-L	112		S3-L	64		S4-L	65
S1-L	43		S2-L	112		S3-L	64		S4-L	66
S1-L	43		S2-L	113		S3-L	65		S4-L	67
S1-L	43		S2-L	113		S3-L	65		S4-L	68
S1-L	45		S2-L	117		S3-L	67		S4-L	68
S1-L	45		S2-L	120		S3-L	67		S4-L	68
S1-L	45		S2-L	120		S3-L	67		S4-L	69
S1-L	45		S2-L	122		S3-L	67		S4-L	69
S1-L	45		S2-L	123		S3-L	67		S4-L	69
S1-L	46		S2-L	135		S3-L	68		S4-L	69
S1-L	46		S2-L	137		S3-L	68		S4-L	69
S1-L	46		S2-L	137		S3-L	68		S4-L	70
S1-L	48		S2-L	138		S3-L	69		S4-L	70
S1-L	48		S2-L	138		S3-L	69		S4-L	72
S1-L	48		S2-L	144		S3-L	69		S4-L	72
S1-L	48		S2-L	145		S3-L	69		S4-L	74
S1-L	49		S2-L	157		S3-L	69		S4-L	74
S1-L	49		S2-L	157		S3-L	69		S4-L	75
S1-L	49		S2-L	158		S3-L	69		S4-L	75
S1-L	49		S2-L	161		S3-L	70		S4-L	76
S1-L	49		S2-L	177		S3-L	71		S4-L	76
S1-L	49		S2-L	180		S3-L	71		S4-L	76
S1-L	49		S2-L	180		S3-L	72		S4-L	78
S1-L	49		S2-L	180		S3-L	72		S4-L	78
S1-L	49		S2-L	188		S3-L	77		S4-L	78
S1-L	49		S2-L	197		S3-L	77		S4-L	79
S1-L	49		S2-L	209		S3-L	78		S4-L	79
S1-L	49		S2-L	209		S3-L	78		S4-L	79
S1-L	49		S2-L	254		S3-L	79		S4-L	79
S1-L	49		S2-L	265		S3-L	80		S4-L	81
S1-L	49		S2-L	281		S3-L	80		S4-L	81
S1-L	50		S2-L	285		S3-L	84		S4-L	81
S1-L	52		S2-L	373		S3-L	84		S4-L	82
S1-L	53		S2-L	375		S3-L	85		S4-L	83
S1-L	54		S2-L	468		S3-L	85		S4-L	88
S1-L	54		S2-L	519		S3-L	87		S4-L	90
S1-L	54		S2-L	613		S3-L	88		S4-L	90
S1-L	54		S2-L	627		S3-L	90		S4-L	91
S1-L	54		S2-L	632		S3-L	91		S4-L	98
S1-L	55		S2-L	785		S3-L	92		S4-L	99
S1-L	55		S2-L	791		S3-L	98		S4-L	101
S1-L	56		S2-L	835		S3-L	99		S4-L	104
S1-L	56		S2-L	920		S3-L	99		S4-L	108
S1-L	57		S2-L	927		S3-L	99		S4-L	109
S1-L	58		S2-L	936		S3-L	107		S4-L	118
S1-L	58		S2-L	943		S3-L	108		S4-L	119
S1-L	59		S2-L	977		S3-L	109		S4-L	120
S1-L	59		S2-L	1038		S3-L	112		S4-L	152
S1-L	59		S2-L	1050		S3-L	127		S4-L	193
S1-L	59		S2-L	1120		S3-L	127		S4-L	256
S1-L	59		S2-L	1122		S3-L	131		S4-L	265
S1-L	59		S2-L	1130		S3-L	133		S4-L	299
S1-L	59		S2-L	1260		S3-L	140		S4-L	300
S1-L	59		S2-L	1400		S3-L	144		S4-L	328
S1-L	59		S2-L	1420		S3-L	145		S4-L	550
S1-L	59		S2-L	1520		S3-L	148		S4-L	888
S1-L	59		S2-L	1581		S3-L	152		S4-L	2720
S1-L	59		S2-L	1720		S3-L	158
S1-L	59		S2-L	2020		S3-L	169
S1-L	59		S2-L	2610		S3-L	170
S1-L	60					S3-L	176
S1-L	60					S3-L	180
S1-L	60					S3-L	189
S1-L	61					S3-L	201
S1-L	63					S3-L	221
						S3-L	293
						S3-L	306

## Sheet: SSP length
Cultivar	Length
S1-D	72
S1-D	113
S1-D	132
S1-D	152
S1-D	154
S1-D	158
S1-D	161
S1-D	163
S1-D	165
S1-D	165
S1-D	169
S1-D	169
S1-D	170
S1-D	173
S1-D	173
S1-D	176
S1-D	177
S1-D	177
S1-D	177
S1-D	177
S1-D	193
S1-D	193
S1-D	196
S1-D	203
S1-D	209
S1-D	209
S1-D	211
S1-D	211
S1-D	214
S1-D	216
S1-D	216
S1-D	219
S1-D	219
S1-D	226
S1-D	229
S1-D	230
S1-D	230
S1-D	230
S1-D	239
S1-D	239
S1-D	242
S1-D	243
S1-D	243
S1-D	244
S1-D	245
S1-D	245
S1-D	248
S1-D	250
S1-D	251
S1-D	254
S1-D	257
S1-D	257
S1-D	259
S1-D	265
S1-D	274
S1-D	274
S1-D	286
S1-D	290
S1-D	293
S1-D	326
S1-D	331
S1-D	342
S1-D	353
S1-D	355
S1-D	357
S1-D	376
S1-D	396
S1-D	433
S1-D	461
S1-D	496
S1-D	1050
S1-L	50
S1-L	64
S1-L	80
S1-L	80
S1-L	82
S1-L	86
S1-L	96
S1-L	96
S1-L	97
S1-L	103
S1-L	103
S1-L	103
S1-L	108
S1-L	112
S1-L	112
S1-L	112
S1-L	112
S1-L	113
S1-L	113
S1-L	113
S1-L	117
S1-L	118
S1-L	122
S1-L	128
S1-L	129
S1-L	137
S1-L	138
S1-L	141
S1-L	144
S1-L	148
S1-L	148
S1-L	148
S1-L	151
S1-L	152
S1-L	152
S1-L	159
S1-L	161
S1-L	161
S1-L	164
S1-L	168
S1-L	168
S1-L	169
S1-L	173
S1-L	173
S1-L	177
S1-L	177
S1-L	177
S1-L	180
S1-L	182
S1-L	187
S1-L	187
S1-L	188
S1-L	188
S1-L	193
S1-L	199
S1-L	201
S1-L	201
S1-L	203
S1-L	208
S1-L	209
S1-L	209
S1-L	209
S1-L	219
S1-L	227
S1-L	234
S1-L	237
S1-L	241
S1-L	242
S1-L	243
S1-L	251
S1-L	258
S1-L	259
S1-L	262
S1-L	269
S1-L	275
S1-L	275
S1-L	281
S1-L	289
S1-L	290
S1-L	290
S1-L	312
S1-L	312
S1-L	322
S1-L	325
S1-L	326
S1-L	339
S1-L	363
S1-L	368
S1-L	370
S1-L	371
S1-L	429
S1-L	466
S1-L	569
S1-L	590
S1-L	621
S1-L	672
S1-L	685
S1-L	1077
S1-L	1091
S1-L	1128
S2-D	26
S2-D	30
S2-D	35
S2-D	37
S2-D	38
S2-D	38
S2-D	45
S2-D	45
S2-D	45
S2-D	50
S2-D	53
S2-D	59
S2-D	62
S2-D	62
S2-D	81
S2-D	87
S2-D	101
S2-D	134
S2-D	153
S2-D	157
S2-D	171
S2-D	196
S2-D	210
S2-D	237
S2-D	242
S2-D	244
S2-D	256
S2-D	256
S2-D	257
S2-D	259
S2-D	263
S2-D	263
S2-D	266
S2-D	270
S2-D	270
S2-D	286
S2-D	286
S2-D	289
S2-D	295
S2-D	297
S2-D	302
S2-D	304
S2-D	314
S2-D	316
S2-D	324
S2-D	340
S2-D	343
S2-D	343
S2-D	346
S2-D	352
S2-D	372
S2-D	378
S2-D	391
S2-D	391
S2-D	392
S2-D	436
S2-D	436
S2-D	438
S2-D	444
S2-D	448
S2-D	452
S2-D	455
S2-D	455
S2-D	460
S2-D	464
S2-D	466
S2-D	482
S2-D	493
S2-D	496
S2-D	498
S2-D	500
S2-D	523
S2-D	531
S2-D	561
S2-D	572
S2-D	574
S2-D	578
S2-D	604
S2-D	619
S2-D	638
S2-D	660
S2-D	664
S2-D	666
S2-D	672
S2-D	680
S2-D	681
S2-D	693
S2-D	739
S2-D	755
S2-D	809
S2-D	836
S2-D	1130
S2-D	1220
S2-D	1220
S2-D	1280
S2-D	1305
S2-D	1430
S2-D	1460
S2-L	16
S2-L	16
S2-L	24
S2-L	36
S2-L	45
S2-L	45
S2-L	48
S2-L	50
S2-L	51
S2-L	55
S2-L	58
S2-L	58
S2-L	59
S2-L	59
S2-L	59
S2-L	61
S2-L	61
S2-L	62
S2-L	62
S2-L	64
S2-L	64
S2-L	64
S2-L	67
S2-L	67
S2-L	68
S2-L	72
S2-L	74
S2-L	74
S2-L	77
S2-L	78
S2-L	78
S2-L	79
S2-L	79
S2-L	79
S2-L	79
S2-L	80
S2-L	80
S2-L	80
S2-L	80
S2-L	80
S2-L	84
S2-L	84
S2-L	85
S2-L	85
S2-L	86
S2-L	87
S2-L	88
S2-L	92
S2-L	93
S2-L	96
S2-L	97
S2-L	98
S2-L	98
S2-L	100
S2-L	101
S2-L	102
S2-L	103
S2-L	103
S2-L	104
S2-L	105
S2-L	113
S2-L	116
S2-L	118
S2-L	118
S2-L	120
S2-L	122
S2-L	126
S2-L	137
S2-L	138
S2-L	138
S2-L	140
S2-L	144
S2-L	145
S2-L	145
S2-L	145
S2-L	148
S2-L	148
S2-L	151
S2-L	151
S2-L	161
S2-L	161
S2-L	162
S2-L	164
S2-L	169
S2-L	177
S2-L	187
S2-L	193
S2-L	209
S2-L	216
S2-L	219
S2-L	241
S2-L	249
S2-L	273
S2-L	296
S2-L	307
S2-L	311
S2-L	333
S2-L	349
S2-L	367
S2-L	367
S2-L	378
S2-L	407
S2-L	432
S2-L	495
S2-L	565
S2-L	591
S2-L	603
S2-L	785
S2-L	827
S2-L	873
S2-L	1000
S2-L	1010
S2-L	1110
S2-L	1110
S2-L	1263
S2-L	2480
S2-L	3502
S3-D	80
S3-D	80
S3-D	80
S3-D	91
S3-D	101
S3-D	112
S3-D	112
S3-D	116
S3-D	125
S3-D	128
S3-D	129
S3-D	132
S3-D	137
S3-D	137
S3-D	148
S3-D	151
S3-D	161
S3-D	164
S3-D	164
S3-D	165
S3-D	171
S3-D	173
S3-D	173
S3-D	173
S3-D	177
S3-D	177
S3-D	180
S3-D	180
S3-D	180
S3-D	180
S3-D	183
S3-D	183
S3-D	187
S3-D	187
S3-D	193
S3-D	193
S3-D	193
S3-D	193
S3-D	196
S3-D	196
S3-D	203
S3-D	204
S3-D	206
S3-D	209
S3-D	209
S3-D	209
S3-D	209
S3-D	211
S3-D	223
S3-D	223
S3-D	227
S3-D	228
S3-D	228
S3-D	230
S3-D	232
S3-D	241
S3-D	242
S3-D	246
S3-D	254
S3-D	254
S3-D	268
S3-D	274
S3-D	274
S3-D	277
S3-D	277
S3-D	302
S3-D	312
S3-D	316
S3-D	322
S3-D	335
S3-D	338
S3-D	339
S3-D	344
S3-D	348
S3-D	351
S3-D	353
S3-D	356
S3-D	365
S3-D	367
S3-D	368
S3-D	371
S3-D	387
S3-D	397
S3-D	403
S3-D	439
S3-D	444
S3-D	451
S3-D	451
S3-D	463
S3-D	464
S3-D	496
S3-D	499
S3-D	523
S3-D	530
S3-D	537
S3-D	573
S3-D	573
S3-D	577
S3-D	580
S3-D	613
S3-D	688
S3-D	764
S3-D	886
S3-D	1002
S3-D	1030
S3-D	1070
S3-L	16
S3-L	69
S3-L	80
S3-L	80
S3-L	96
S3-L	117
S3-L	125
S3-L	128
S3-L	137
S3-L	137
S3-L	144
S3-L	144
S3-L	151
S3-L	161
S3-L	165
S3-L	171
S3-L	171
S3-L	177
S3-L	180
S3-L	184
S3-L	193
S3-L	193
S3-L	193
S3-L	201
S3-L	209
S3-L	209
S3-L	219
S3-L	219
S3-L	225
S3-L	241
S3-L	241
S3-L	241
S3-L	246
S3-L	257
S3-L	259
S3-L	259
S3-L	264
S3-L	268
S3-L	273
S3-L	274
S3-L	281
S3-L	281
S3-L	288
S3-L	303
S3-L	305
S3-L	305
S3-L	306
S3-L	307
S3-L	312
S3-L	319
S3-L	322
S3-L	322
S3-L	323
S3-L	330
S3-L	331
S3-L	339
S3-L	345
S3-L	346
S3-L	346
S3-L	357
S3-L	361
S3-L	362
S3-L	364
S3-L	367
S3-L	367
S3-L	376
S3-L	387
S3-L	396
S3-L	399
S3-L	402
S3-L	407
S3-L	412
S3-L	417
S3-L	435
S3-L	435
S3-L	438
S3-L	439
S3-L	442
S3-L	447
S3-L	460
S3-L	469
S3-L	484
S3-L	487
S3-L	497
S3-L	499
S3-L	509
S3-L	510
S3-L	515
S3-L	518
S3-L	543
S3-L	546
S3-L	546
S3-L	555
S3-L	576
S3-L	577
S3-L	577
S3-L	579
S3-L	608
S3-L	611
S3-L	619
S3-L	621
S3-L	624
S3-L	641
S3-L	646
S3-L	649
S3-L	668
S3-L	696
S3-L	732
S3-L	774
S3-L	831
S3-L	855
S3-L	1520
S3-L	1524
S4-D	80
S4-D	82
S4-D	86
S4-D	92
S4-D	96
S4-D	97
S4-D	97
S4-D	98
S4-D	102
S4-D	103
S4-D	103
S4-D	116
S4-D	122
S4-D	128
S4-D	129
S4-D	129
S4-D	132
S4-D	132
S4-D	141
S4-D	143
S4-D	144
S4-D	145
S4-D	148
S4-D	151
S4-D	160
S4-D	161
S4-D	161
S4-D	161
S4-D	173
S4-D	177
S4-D	177
S4-D	177
S4-D	178
S4-D	183
S4-D	188
S4-D	194
S4-D	196
S4-D	199
S4-D	199
S4-D	203
S4-D	206
S4-D	219
S4-D	223
S4-D	227
S4-D	228
S4-D	235
S4-D	237
S4-D	239
S4-D	242
S4-D	243
S4-D	243
S4-D	245
S4-D	249
S4-D	252
S4-D	254
S4-D	262
S4-D	274
S4-D	276
S4-D	277
S4-D	281
S4-D	281
S4-D	290
S4-D	296
S4-D	297
S4-D	305
S4-D	307
S4-D	312
S4-D	339
S4-D	353
S4-D	355
S4-D	361
S4-D	370
S4-D	386
S4-D	387
S4-D	389
S4-D	392
S4-D	407
S4-D	410
S4-D	410
S4-D	410
S4-D	410
S4-D	420
S4-D	422
S4-D	423
S4-D	433
S4-D	445
S4-D	447
S4-D	454
S4-D	458
S4-D	461
S4-D	464
S4-D	471
S4-D	471
S4-D	475
S4-D	484
S4-D	487
S4-D	488
S4-D	499
S4-D	502
S4-D	515
S4-D	521
S4-D	524
S4-D	534
S4-D	535
S4-D	554
S4-D	554
S4-D	564
S4-D	567
S4-D	570
S4-D	595
S4-D	601
S4-D	641
S4-D	672
S4-D	725
S4-D	790
S4-D	822
S4-D	1085
S4-L	31
S4-L	32
S4-L	72
S4-L	80
S4-L	80
S4-L	86
S4-L	86
S4-L	86
S4-L	91
S4-L	91
S4-L	93
S4-L	96
S4-L	101
S4-L	103
S4-L	106
S4-L	112
S4-L	112
S4-L	113
S4-L	113
S4-L	117
S4-L	117
S4-L	122
S4-L	124
S4-L	125
S4-L	125
S4-L	128
S4-L	128
S4-L	129
S4-L	129
S4-L	129
S4-L	129
S4-L	132
S4-L	132
S4-L	137
S4-L	144
S4-L	144
S4-L	144
S4-L	144
S4-L	144
S4-L	144
S4-L	145
S4-L	145
S4-L	148
S4-L	148
S4-L	152
S4-L	152
S4-L	152
S4-L	158
S4-L	161
S4-L	161
S4-L	161
S4-L	164
S4-L	165
S4-L	168
S4-L	170
S4-L	174
S4-L	177
S4-L	177
S4-L	180
S4-L	187
S4-L	187
S4-L	193
S4-L	193
S4-L	193
S4-L	195
S4-L	196
S4-L	201
S4-L	203
S4-L	209
S4-L	219
S4-L	225
S4-L	225
S4-L	230
S4-L	230
S4-L	234
S4-L	241
S4-L	246
S4-L	249
S4-L	252
S4-L	254
S4-L	257
S4-L	257
S4-L	259
S4-L	259
S4-L	266
S4-L	270
S4-L	273
S4-L	277
S4-L	277
S4-L	281
S4-L	281
S4-L	286
S4-L	286
S4-L	290
S4-L	296
S4-L	300
S4-L	307
S4-L	309
S4-L	322
S4-L	332
S4-L	336
S4-L	344
S4-L	353
S4-L	361
S4-L	370
S4-L	371
S4-L	374
S4-L	389
S4-L	391
S4-L	419
S4-L	419
S4-L	427
S4-L	438
S4-L	448
S4-L	458
S4-L	531
S4-L	537
S4-L	541
S4-L	607
S4-L	726
S4-L	733
S4-L	1366
S5-D	260
S5-D	335
S5-D	338
S5-D	354
S5-D	396
S5-D	414
S5-D	425
S5-D	450
S5-D	460
S5-D	489
S5-D	535
S5-D	536
S5-D	560
S5-D	616
S5-D	663
S5-D	666
S5-D	682
S5-D	694
S5-D	714
S5-D	769
S5-D	788
S5-D	790
S5-D	801
S5-D	823
S5-D	831
S5-D	836
S5-D	907
S5-D	947
S5-D	957
S5-D	1029
S5-D	1064
S5-D	1271
S5-D	1360
S5-D	1367
S5-D	1498
S5-D	1600
S5-D	1689
S5-D	1842
S5-D	5085
S5-L	10
S5-L	21
S5-L	30
S5-L	32
S5-L	38
S5-L	42
S5-L	45
S5-L	48
S5-L	52
S5-L	53
S5-L	53
S5-L	54
S5-L	59
S5-L	63
S5-L	64
S5-L	66
S5-L	68
S5-L	70
S5-L	71
S5-L	71
S5-L	72
S5-L	74
S5-L	74
S5-L	74
S5-L	77
S5-L	80
S5-L	81
S5-L	84
S5-L	85
S5-L	85
S5-L	85
S5-L	85
S5-L	87
S5-L	98
S5-L	99
S5-L	100
S5-L	106
S5-L	106
S5-L	108
S5-L	108
S5-L	115
S5-L	117
S5-L	121
S5-L	128
S5-L	136
S5-L	142
S5-L	144
S5-L	147
S5-L	152
S5-L	159
S5-L	166
S5-L	166
S5-L	170
S5-L	171
S5-L	247
S5-L	258
S5-L	259
S5-L	266
S5-L	269
S5-L	272
S5-L	276
S5-L	282
S5-L	289
S5-L	319
S5-L	329
S5-L	348
S5-L	350
S5-L	395
S5-L	423
S5-L	425
S5-L	428
S5-L	447
S5-L	454
S5-L	466
S5-L	472
S5-L	498
S5-L	515
S5-L	518
S5-L	531
S5-L	533
S5-L	572
S5-L	588
S5-L	618
S5-L	626
S5-L	657
S5-L	672
S5-L	681
S5-L	738
S5-L	755
S5-L	767
S5-L	784
S5-L	857
S5-L	937
S5-L	940
S5-L	944
S5-L	1110
S5-L	1942
S5-L	1975

## Sheet: WSP width
Cultivar	Width
S1-D	12
S1-D	17
S1-D	18
S1-D	20
S1-D	20
S1-D	20
S1-D	20
S1-D	20
S1-D	20
S1-D	21
S1-D	22
S1-D	22
S1-D	23
S1-D	24
S1-D	24
S1-D	24
S1-D	24
S1-D	24
S1-D	25
S1-D	25
S1-D	25
S1-D	25
S1-D	25
S1-D	25
S1-D	25
S1-D	26
S1-D	26
S1-D	26
S1-D	27
S1-D	27
S1-D	27
S1-D	27
S1-D	27
S1-D	27
S1-D	27
S1-D	28
S1-D	29
S1-D	29
S1-D	29
S1-D	29
S1-D	29
S1-D	29
S1-D	29
S1-D	29
S1-D	30
S1-D	30
S1-D	30
S1-D	30
S1-D	30
S1-D	30
S1-D	30
S1-D	31
S1-D	31
S1-D	31
S1-D	31
S1-D	31
S1-D	32
S1-D	32
S1-D	32
S1-D	32
S1-D	32
S1-D	33
S1-D	33
S1-D	33
S1-D	34
S1-D	34
S1-D	34
S1-D	34
S1-D	35
S1-D	36
S1-D	36
S1-D	36
S1-D	37
S1-D	37
S1-D	38
S1-D	38
S1-D	38
S1-D	39
S1-D	40
S1-D	41
S1-D	41
S1-D	43
S1-D	44
S1-D	45
S1-D	51
S1-D	53
S1-D	53
S1-D	56
S1-D	114
S1-D	147
S1-L	23
S1-L	25
S1-L	26
S1-L	29
S1-L	29
S1-L	29
S1-L	29
S1-L	30
S1-L	30
S1-L	30
S1-L	30
S1-L	30
S1-L	30
S1-L	31
S1-L	31
S1-L	31
S1-L	32
S1-L	33
S1-L	34
S1-L	34
S1-L	35
S1-L	35
S1-L	35
S1-L	35
S1-L	36
S1-L	36
S1-L	37
S1-L	39
S1-L	39
S1-L	39
S1-L	39
S1-L	39
S1-L	39
S1-L	39
S1-L	40
S1-L	40
S1-L	40
S1-L	40
S1-L	40
S1-L	40
S1-L	40
S1-L	41
S1-L	41
S1-L	41
S1-L	41
S1-L	41
S1-L	41
S1-L	42
S1-L	42
S1-L	42
S1-L	44
S1-L	45
S1-L	46
S1-L	48
S1-L	49
S1-L	49
S1-L	49
S1-L	50
S1-L	50
S1-L	50
S1-L	51
S1-L	52
S1-L	52
S1-L	52
S1-L	52
S1-L	53
S1-L	53
S1-L	54
S1-L	54
S1-L	54
S1-L	57
S1-L	58
S1-L	59
S1-L	59
S1-L	60
S1-L	60
S1-L	60
S1-L	61
S1-L	61
S1-L	65
S1-L	68
S1-L	68
S1-L	69
S1-L	70
S1-L	70
S1-L	71
S1-L	71
S1-L	79
S1-L	81
S1-L	92
S1-L	95
S1-L	122
S2-D	20
S2-D	20
S2-D	21
S2-D	24
S2-D	25
S2-D	25
S2-D	25
S2-D	25
S2-D	28
S2-D	28
S2-D	29
S2-D	30
S2-D	31
S2-D	31
S2-D	34
S2-D	34
S2-D	34
S2-D	34
S2-D	35
S2-D	35
S2-D	35
S2-D	36
S2-D	36
S2-D	37
S2-D	37
S2-D	38
S2-D	39
S2-D	39
S2-D	39
S2-D	39
S2-D	39
S2-D	39
S2-D	40
S2-D	40
S2-D	40
S2-D	40
S2-D	40
S2-D	40
S2-D	40
S2-D	41
S2-D	41
S2-D	41
S2-D	42
S2-D	43
S2-D	43
S2-D	43
S2-D	44
S2-D	45
S2-D	45
S2-D	45
S2-D	45
S2-D	47
S2-D	47
S2-D	48
S2-D	48
S2-D	49
S2-D	49
S2-D	49
S2-D	49
S2-D	49
S2-D	50
S2-D	50
S2-D	51
S2-D	52
S2-D	52
S2-D	54
S2-D	55
S2-D	56
S2-D	56
S2-D	57
S2-D	59
S2-D	59
S2-D	59
S2-D	59
S2-D	59
S2-D	60
S2-D	60
S2-D	60
S2-D	61
S2-D	62
S2-D	64
S2-D	65
S2-D	65
S2-D	68
S2-D	70
S2-D	72
S2-D	73
S2-D	73
S2-D	75
S2-D	75
S2-D	78
S2-D	78
S2-D	80
S2-D	93
S2-D	97
S2-D	97
S2-D	103
S2-L	19
S2-L	19
S2-L	19
S2-L	20
S2-L	20
S2-L	20
S2-L	20
S2-L	21
S2-L	21
S2-L	23
S2-L	24
S2-L	24
S2-L	24
S2-L	25
S2-L	25
S2-L	25
S2-L	25
S2-L	25
S2-L	25
S2-L	26
S2-L	26
S2-L	26
S2-L	27
S2-L	27
S2-L	27
S2-L	27
S2-L	29
S2-L	30
S2-L	30
S2-L	30
S2-L	30
S2-L	30
S2-L	30
S2-L	31
S2-L	31
S2-L	31
S2-L	31
S2-L	31
S2-L	31
S2-L	31
S2-L	32
S2-L	32
S2-L	32
S2-L	32
S2-L	33
S2-L	33
S2-L	34
S2-L	34
S2-L	35
S2-L	35
S2-L	35
S2-L	35
S2-L	35
S2-L	36
S2-L	36
S2-L	36
S2-L	37
S2-L	39
S2-L	39
S2-L	39
S2-L	40
S2-L	40
S2-L	40
S2-L	43
S2-L	43
S2-L	44
S2-L	45
S2-L	45
S2-L	45
S2-L	51
S2-L	52
S2-L	53
S2-L	54
S2-L	54
S2-L	60
S2-L	65
S2-L	69
S2-L	69
S2-L	70
S2-L	70
S2-L	71
S2-L	74
S2-L	77
S2-L	80
S2-L	80
S2-L	89
S2-L	91
S2-L	93
S2-L	98
S3-D	30
S3-D	32
S3-D	33
S3-D	33
S3-D	34
S3-D	36
S3-D	37
S3-D	39
S3-D	39
S3-D	39
S3-D	39
S3-D	39
S3-D	39
S3-D	40
S3-D	40
S3-D	40
S3-D	40
S3-D	40
S3-D	40
S3-D	41
S3-D	41
S3-D	41
S3-D	42
S3-D	42
S3-D	42
S3-D	43
S3-D	45
S3-D	45
S3-D	47
S3-D	49
S3-D	49
S3-D	49
S3-D	49
S3-D	49
S3-D	49
S3-D	49
S3-D	49
S3-D	49
S3-D	49
S3-D	50
S3-D	50
S3-D	50
S3-D	50
S3-D	51
S3-D	51
S3-D	52
S3-D	52
S3-D	52
S3-D	53
S3-D	53
S3-D	54
S3-D	55
S3-D	56
S3-D	56
S3-D	56
S3-D	59
S3-D	59
S3-D	59
S3-D	59
S3-D	60
S3-D	60
S3-D	61
S3-D	61
S3-D	61
S3-D	62
S3-D	64
S3-D	64
S3-D	64
S3-D	66
S3-D	67
S3-D	68
S3-D	68
S3-D	68
S3-D	69
S3-D	69
S3-D	71
S3-D	71
S3-D	73
S3-D	73
S3-D	75
S3-D	77
S3-D	79
S3-D	79
S3-D	82
S3-D	88
S3-D	88
S3-D	88
S3-D	88
S3-D	90
S3-D	101
S3-D	105
S3-D	121
S3-L	21
S3-L	21
S3-L	21
S3-L	25
S3-L	25
S3-L	25
S3-L	25
S3-L	25
S3-L	25
S3-L	25
S3-L	25
S3-L	25
S3-L	25
S3-L	26
S3-L	29
S3-L	29
S3-L	29
S3-L	30
S3-L	30
S3-L	30
S3-L	31
S3-L	31
S3-L	32
S3-L	32
S3-L	32
S3-L	32
S3-L	33
S3-L	33
S3-L	34
S3-L	34
S3-L	34
S3-L	35
S3-L	35
S3-L	36
S3-L	37
S3-L	38
S3-L	38
S3-L	39
S3-L	39
S3-L	39
S3-L	39
S3-L	39
S3-L	39
S3-L	40
S3-L	40
S3-L	40
S3-L	40
S3-L	40
S3-L	40
S3-L	40
S3-L	40
S3-L	40
S3-L	41
S3-L	42
S3-L	42
S3-L	43
S3-L	43
S3-L	44
S3-L	44
S3-L	44
S3-L	44
S3-L	44
S3-L	46
S3-L	46
S3-L	46
S3-L	46
S3-L	49
S3-L	49
S3-L	49
S3-L	49
S3-L	50
S3-L	50
S3-L	50
S3-L	51
S3-L	51
S3-L	51
S3-L	51
S3-L	53
S3-L	54
S3-L	55
S3-L	55
S3-L	55
S3-L	56
S3-L	59
S3-L	59
S3-L	59
S3-L	60
S3-L	67
S3-L	68
S3-L	70
S3-L	90
S4-D	18
S4-D	19
S4-D	20
S4-D	20
S4-D	20
S4-D	20
S4-D	20
S4-D	20
S4-D	20
S4-D	20
S4-D	22
S4-D	22
S4-D	24
S4-D	24
S4-D	24
S4-D	24
S4-D	24
S4-D	24
S4-D	24
S4-D	24
S4-D	25
S4-D	25
S4-D	25
S4-D	25
S4-D	25
S4-D	25
S4-D	25
S4-D	25
S4-D	25
S4-D	25
S4-D	25
S4-D	25
S4-D	25
S4-D	26
S4-D	26
S4-D	26
S4-D	26
S4-D	26
S4-D	26
S4-D	27
S4-D	28
S4-D	30
S4-D	30
S4-D	30
S4-D	30
S4-D	30
S4-D	30
S4-D	30
S4-D	30
S4-D	30
S4-D	31
S4-D	31
S4-D	31
S4-D	31
S4-D	31
S4-D	32
S4-D	32
S4-D	32
S4-D	32
S4-D	33
S4-D	34
S4-D	34
S4-D	35
S4-D	35
S4-D	35
S4-D	35
S4-D	35
S4-D	35
S4-D	35
S4-D	36
S4-D	36
S4-D	38
S4-D	38
S4-D	38
S4-D	38
S4-D	39
S4-D	41
S4-D	41
S4-D	42
S4-D	42
S4-D	43
S4-D	46
S4-D	46
S4-D	46
S4-D	48
S4-D	50
S4-D	50
S4-D	53
S4-D	53
S4-D	60
S4-L	22
S4-L	30
S4-L	30
S4-L	33
S4-L	33
S4-L	33
S4-L	34
S4-L	34
S4-L	35
S4-L	37
S4-L	39
S4-L	40
S4-L	40
S4-L	40
S4-L	40
S4-L	41
S4-L	41
S4-L	42
S4-L	43
S4-L	44
S4-L	44
S4-L	46
S4-L	49
S4-L	49
S4-L	50
S4-L	51
S4-L	51
S4-L	51
S4-L	51
S4-L	51
S4-L	51
S4-L	52
S4-L	53
S4-L	54
S4-L	59
S4-L	59
S4-L	60
S4-L	60
S4-L	60
S4-L	61
S4-L	61
S4-L	62
S4-L	63
S4-L	63
S4-L	64
S4-L	65
S4-L	67
S4-L	69
S4-L	70
S4-L	70
S4-L	71
S4-L	71
S4-L	72
S4-L	72
S4-L	74
S4-L	75
S4-L	77
S4-L	78
S4-L	78
S4-L	79
S4-L	79
S4-L	79
S4-L	79
S4-L	79
S4-L	82
S4-L	82
S4-L	83
S4-L	86
S4-L	86
S4-L	86
S4-L	89
S4-L	89
S4-L	90
S4-L	92
S4-L	92
S4-L	93
S4-L	93
S4-L	95
S4-L	99
S4-L	99
S4-L	101
S4-L	102
S4-L	104
S4-L	105
S4-L	108
S4-L	112
S4-L	128
S4-L	137
S4-L	142
S5-D	45
S5-D	47
S5-D	47
S5-D	47
S5-D	47
S5-D	49
S5-D	49
S5-D	49
S5-D	50
S5-D	51
S5-D	51
S5-D	51
S5-D	51
S5-D	51
S5-D	52
S5-D	52
S5-D	54
S5-D	54
S5-D	54
S5-D	54
S5-D	54
S5-D	55
S5-D	55
S5-D	55
S5-D	55
S5-D	55
S5-D	55
S5-D	56
S5-D	56
S5-D	57
S5-D	57
S5-D	58
S5-D	58
S5-D	58
S5-D	58
S5-D	58
S5-D	59
S5-D	59
S5-D	60
S5-D	61
S5-D	61
S5-D	62
S5-D	62
S5-D	62
S5-D	62
S5-D	62
S5-D	62
S5-D	62
S5-D	63
S5-D	63
S5-D	64
S5-D	64
S5-D	64
S5-D	65
S5-D	66
S5-D	66
S5-D	66
S5-D	67
S5-D	68
S5-D	68
S5-D	68
S5-D	68
S5-D	68
S5-D	68
S5-D	68
S5-D	69
S5-D	69
S5-D	71
S5-D	72
S5-D	72
S5-D	72
S5-D	73
S5-D	75
S5-D	75
S5-D	75
S5-D	75
S5-D	78
S5-D	78
S5-D	78
S5-D	79
S5-D	80
S5-D	81
S5-D	83
S5-D	99
S5-D	100
S5-D	100
S5-D	101
S5-D	104
S5-D	104
S5-L	20
S5-L	24
S5-L	26
S5-L	26
S5-L	26
S5-L	28
S5-L	29
S5-L	29
S5-L	29
S5-L	29
S5-L	30
S5-L	30
S5-L	30
S5-L	31
S5-L	31
S5-L	32
S5-L	32
S5-L	33
S5-L	33
S5-L	33
S5-L	34
S5-L	34
S5-L	34
S5-L	34
S5-L	34
S5-L	34
S5-L	35
S5-L	35
S5-L	35
S5-L	35
S5-L	35
S5-L	36
S5-L	38
S5-L	38
S5-L	39
S5-L	39
S5-L	39
S5-L	39
S5-L	39
S5-L	39
S5-L	40
S5-L	40
S5-L	41
S5-L	44
S5-L	44
S5-L	44
S5-L	44
S5-L	44
S5-L	45
S5-L	45
S5-L	46
S5-L	47
S5-L	48
S5-L	48
S5-L	48
S5-L	48
S5-L	49
S5-L	49
S5-L	49
S5-L	50
S5-L	50
S5-L	50
S5-L	51
S5-L	52
S5-L	52
S5-L	53
S5-L	53
S5-L	56
S5-L	59
S5-L	60
S5-L	61
S5-L	61
S5-L	62
S5-L	64
S5-L	64
S5-L	65
S5-L	65
S5-L	69
S5-L	69
S5-L	71
S5-L	72
S5-L	76
S5-L	78
S5-L	78
S5-L	88
S5-L	91
S5-L	98
S5-L	122
S5-L	127
S5-L	129

## Sheet: CSP width
Cultivar	Width
S1-D	33
S1-D	33
S1-D	34
S1-D	35
S1-D	37
S1-D	43
S1-D	44
S1-D	48
S1-D	51
S1-D	59
S1-D	60
S1-D	61
S1-D	64
S1-D	68
S1-D	69
S1-D	71
S1-D	78
S1-D	78
S1-D	81
S1-D	85
S1-D	87
S1-D	96
S1-D	123
S1-L	29
S1-L	32
S1-L	32
S1-L	33
S1-L	34
S1-L	35
S1-L	35
S1-L	35
S1-L	35
S1-L	35
S1-L	35
S1-L	38
S1-L	38
S1-L	38
S1-L	38
S1-L	39
S1-L	39
S1-L	39
S1-L	39
S1-L	39
S1-L	39
S1-L	39
S1-L	39
S1-L	39
S1-L	41
S1-L	42
S1-L	43
S1-L	43
S1-L	43
S1-L	45
S1-L	45
S1-L	45
S1-L	45
S1-L	45
S1-L	46
S1-L	46
S1-L	46
S1-L	48
S1-L	48
S1-L	48
S1-L	48
S1-L	49
S1-L	49
S1-L	49
S1-L	49
S1-L	49
S1-L	49
S1-L	49
S1-L	49
S1-L	49
S1-L	49
S1-L	49
S1-L	49
S1-L	49
S1-L	49
S1-L	49
S1-L	50
S1-L	52
S1-L	53
S1-L	54
S1-L	54
S1-L	54
S1-L	54
S1-L	54
S1-L	55
S1-L	55
S1-L	56
S1-L	56
S1-L	57
S1-L	58
S1-L	58
S1-L	59
S1-L	59
S1-L	59
S1-L	59
S1-L	59
S1-L	59
S1-L	59
S1-L	59
S1-L	59
S1-L	59
S1-L	59
S1-L	59
S1-L	59
S1-L	59
S1-L	60
S1-L	60
S1-L	60
S1-L	61
S1-L	63
S2-D	5
S2-D	10
S2-D	10
S2-D	11
S2-D	11
S2-D	11
S2-D	11
S2-D	12
S2-D	12
S2-D	12
S2-D	12
S2-D	12
S2-D	13
S2-D	13
S2-D	13
S2-D	13
S2-D	13
S2-D	13
S2-D	13
S2-D	15
S2-D	15
S2-D	15
S2-D	15
S2-D	15
S2-D	15
S2-D	15
S2-D	16
S2-D	16
S2-D	16
S2-D	17
S2-D	17
S2-D	17
S2-D	17
S2-D	18
S2-D	18
S2-D	18
S2-D	18
S2-D	19
S2-D	19
S2-D	19
S2-D	19
S2-D	19
S2-D	19
S2-D	19
S2-D	20
S2-D	20
S2-D	20
S2-D	20
S2-D	20
S2-D	20
S2-D	20
S2-D	20
S2-D	20
S2-D	20
S2-D	21
S2-D	21
S2-D	21
S2-D	21
S2-D	21
S2-D	21
S2-D	21
S2-D	22
S2-D	23
S2-D	24
S2-D	24
S2-D	24
S2-D	24
S2-D	24
S2-D	24
S2-D	24
S2-D	24
S2-D	24
S2-D	24
S2-D	24
S2-D	24
S2-D	24
S2-D	24
S2-D	25
S2-D	25
S2-D	25
S2-D	25
S2-D	26
S2-D	27
S2-D	29
S2-D	29
S2-D	30
S2-D	30
S2-D	31
S2-D	31
S2-D	34
S2-D	40
S2-D	59
S2-L	40
S2-L	40
S2-L	59
S2-L	59
S2-L	59
S2-L	59
S2-L	59
S2-L	61
S2-L	61
S2-L	61
S2-L	63
S2-L	65
S2-L	78
S2-L	78
S2-L	78
S2-L	78
S2-L	78
S2-L	79
S2-L	79
S2-L	79
S2-L	79
S2-L	79
S2-L	80
S2-L	80
S2-L	81
S2-L	81
S2-L	82
S2-L	82
S2-L	83
S2-L	85
S2-L	88
S2-L	91
S2-L	98
S2-L	98
S2-L	98
S2-L	98
S2-L	98
S2-L	98
S2-L	98
S2-L	98
S2-L	98
S2-L	98
S2-L	99
S2-L	100
S2-L	100
S2-L	100
S2-L	101
S2-L	103
S2-L	104
S2-L	108
S2-L	110
S2-L	112
S2-L	112
S2-L	112
S2-L	117
S2-L	117
S2-L	118
S2-L	118
S2-L	119
S2-L	120
S2-L	120
S2-L	122
S2-L	123
S2-L	123
S2-L	135
S2-L	137
S2-L	138
S2-L	138
S2-L	145
S2-L	157
S2-L	157
S2-L	157
S2-L	158
S2-L	161
S2-L	167
S2-L	176
S2-L	180
S2-L	180
S2-L	197
S2-L	254
S2-L	341
S2-L	355
S2-L	363
S3-D	8
S3-D	9
S3-D	10
S3-D	10
S3-D	11
S3-D	11
S3-D	11
S3-D	13
S3-D	13
S3-D	13
S3-D	13
S3-D	14
S3-D	15
S3-D	15
S3-D	15
S3-D	15
S3-D	15
S3-D	15
S3-D	15
S3-D	15
S3-D	15
S3-D	15
S3-D	15
S3-D	15
S3-D	15
S3-D	16
S3-D	16
S3-D	16
S3-D	16
S3-D	17
S3-D	17
S3-D	17
S3-D	17
S3-D	17
S3-D	18
S3-D	18
S3-D	18
S3-D	18
S3-D	18
S3-D	19
S3-D	19
S3-D	19
S3-D	20
S3-D	20
S3-D	20
S3-D	20
S3-D	20
S3-D	20
S3-D	20
S3-D	20
S3-D	20
S3-D	21
S3-D	21
S3-D	21
S3-D	21
S3-D	21
S3-D	21
S3-D	22
S3-D	22
S3-D	22
S3-D	22
S3-D	22
S3-D	22
S3-D	23
S3-D	23
S3-D	23
S3-D	23
S3-D	23
S3-D	24
S3-D	24
S3-D	24
S3-D	24
S3-D	25
S3-D	25
S3-D	25
S3-D	25
S3-D	25
S3-D	26
S3-D	26
S3-D	26
S3-D	26
S3-D	27
S3-D	28
S3-D	29
S3-D	29
S3-D	30
S3-D	35
S3-D	39
S3-D	40
S3-D	48
S3-L	39
S3-L	41
S3-L	41
S3-L	44
S3-L	44
S3-L	49
S3-L	49
S3-L	50
S3-L	50
S3-L	51
S3-L	52
S3-L	53
S3-L	53
S3-L	55
S3-L	55
S3-L	55
S3-L	55
S3-L	56
S3-L	59
S3-L	59
S3-L	59
S3-L	61
S3-L	61
S3-L	62
S3-L	63
S3-L	63
S3-L	64
S3-L	64
S3-L	65
S3-L	65
S3-L	67
S3-L	67
S3-L	67
S3-L	67
S3-L	67
S3-L	68
S3-L	68
S3-L	68
S3-L	68
S3-L	69
S3-L	69
S3-L	69
S3-L	69
S3-L	69
S3-L	69
S3-L	69
S3-L	70
S3-L	70
S3-L	70
S3-L	71
S3-L	71
S3-L	72
S3-L	72
S3-L	72
S3-L	76
S3-L	77
S3-L	77
S3-L	78
S3-L	78
S3-L	78
S3-L	78
S3-L	78
S3-L	79
S3-L	80
S3-L	80
S3-L	80
S3-L	82
S3-L	82
S3-L	84
S3-L	87
S3-L	88
S3-L	90
S3-L	90
S3-L	91
S3-L	91
S3-L	92
S3-L	92
S3-L	93
S3-L	98
S3-L	99
S3-L	99
S3-L	99
S3-L	105
S3-L	106
S3-L	108
S3-L	109
S3-L	127
S3-L	128
S3-L	158
S4-D	37
S4-D	43
S4-D	45
S4-D	49
S4-D	49
S4-D	53
S4-D	53
S4-D	53
S4-D	54
S4-D	55
S4-D	55
S4-D	55
S4-D	59
S4-D	59
S4-D	59
S4-D	61
S4-D	63
S4-D	66
S4-D	66
S4-D	68
S4-D	69
S4-D	70
S4-D	70
S4-D	72
S4-D	75
S4-D	78
S4-D	79
S4-D	79
S4-D	79
S4-D	83
S4-D	88
S4-D	88
S4-D	88
S4-D	90
S4-D	90
S4-D	90
S4-D	90
S4-D	92
S4-D	97
S4-D	98
S4-L	30
S4-L	31
S4-L	36
S4-L	38
S4-L	39
S4-L	40
S4-L	41
S4-L	42
S4-L	42
S4-L	45
S4-L	47
S4-L	48
S4-L	49
S4-L	49
S4-L	49
S4-L	49
S4-L	49
S4-L	49
S4-L	49
S4-L	49
S4-L	49
S4-L	49
S4-L	50
S4-L	50
S4-L	54
S4-L	54
S4-L	55
S4-L	55
S4-L	55
S4-L	55
S4-L	57
S4-L	57
S4-L	58
S4-L	59
S4-L	59
S4-L	59
S4-L	59
S4-L	59
S4-L	59
S4-L	59
S4-L	59
S4-L	59
S4-L	60
S4-L	60
S4-L	60
S4-L	61
S4-L	61
S4-L	61
S4-L	62
S4-L	62
S4-L	62
S4-L	62
S4-L	62
S4-L	64
S4-L	64
S4-L	65
S4-L	66
S4-L	67
S4-L	68
S4-L	68
S4-L	68
S4-L	69
S4-L	69
S4-L	69
S4-L	69
S4-L	69
S4-L	70
S4-L	70
S4-L	72
S4-L	72
S4-L	74
S4-L	74
S4-L	75
S4-L	75
S4-L	76
S4-L	76
S4-L	76
S4-L	78
S4-L	78
S4-L	78
S4-L	79
S4-L	79
S4-L	79
S4-L	79
S4-L	81
S4-L	81
S4-L	81
S4-L	82
S4-L	83
S4-L	88
S4-L	90
S4-L	90
S4-L	91
S4-L	98
S4-L	99
S4-L	101
S4-L	104
S4-L	108
S4-L	109
S4-L	118
S4-L	119
S5-D	79
S5-D	85
S5-D	78
S5-D	52
S5-D	73
S5-D	89
S5-D	87
S5-D	63
S5-D	88
S5-D	38
S5-D	50
S5-D	76
S5-D	55
S5-D	55
S5-D	84
S5-D	63
S5-D	63
S5-D	94
S5-D	39
S5-D	95
S5-D	46
S5-L	19
S5-L	28
S5-L	59
S5-L	25
S5-L	44
S5-L	31
S5-L	37
S5-L	66
S5-L	74
S5-L	45
S5-L	20
S5-L	26
S5-L	51
S5-L	32
S5-L	46
S5-L	59
S5-L	54
S5-L	20
S5-L	18
S5-L	38
S5-L	21
S5-L	44

## Sheet: SSP width
Cultivar	Width
S1-D	39
S1-D	39
S1-D	39
S1-D	39
S1-D	42
S1-D	42
S1-D	42
S1-D	43
S1-D	43
S1-D	44
S1-D	45
S1-D	45
S1-D	45
S1-D	45
S1-D	46
S1-D	47
S1-D	48
S1-D	49
S1-D	49
S1-D	49
S1-D	49
S1-D	49
S1-D	50
S1-D	50
S1-D	50
S1-D	54
S1-D	54
S1-D	55
S1-D	56
S1-D	58
S1-D	59
S1-D	59
S1-D	59
S1-D	59
S1-D	59
S1-D	59
S1-D	59
S1-D	60
S1-D	60
S1-D	61
S1-D	62
S1-D	62
S1-D	63
S1-D	63
S1-D	64
S1-D	64
S1-D	65
S1-D	65
S1-D	67
S1-D	67
S1-D	67
S1-D	67
S1-D	68
S1-D	69
S1-D	69
S1-D	70
S1-D	72
S1-D	72
S1-D	73
S1-D	75
S1-D	78
S1-D	78
S1-D	81
S1-D	82
S1-D	82
S1-D	83
S1-D	84
S1-D	102
S1-D	102
S1-D	102
S1-D	105
S1-D	108
S1-D	109
S1-D	111
S1-D	137
S1-D	137
S1-D	177
S1-D	559
S1-L	39
S1-L	39
S1-L	39
S1-L	39
S1-L	39
S1-L	39
S1-L	39
S1-L	39
S1-L	40
S1-L	40
S1-L	41
S1-L	43
S1-L	46
S1-L	46
S1-L	47
S1-L	48
S1-L	48
S1-L	49
S1-L	50
S1-L	52
S1-L	52
S1-L	53
S1-L	53
S1-L	54
S1-L	54
S1-L	59
S1-L	59
S1-L	59
S1-L	59
S1-L	59
S1-L	59
S1-L	59
S1-L	59
S1-L	59
S1-L	59
S1-L	59
S1-L	59
S1-L	59
S1-L	59
S1-L	59
S1-L	59
S1-L	59
S1-L	59
S1-L	59
S1-L	60
S1-L	60
S1-L	60
S1-L	61
S1-L	61
S1-L	62
S1-L	62
S1-L	63
S1-L	65
S1-L	65
S1-L	65
S1-L	65
S1-L	73
S1-L	73
S1-L	74
S1-L	75
S1-L	76
S1-L	77
S1-L	77
S1-L	78
S1-L	78
S1-L	78
S1-L	78
S1-L	79
S1-L	79
S1-L	79
S1-L	80
S1-L	80
S1-L	82
S1-L	82
S1-L	83
S1-L	83
S1-L	86
S1-L	88
S1-L	90
S1-L	93
S1-L	94
S1-L	101
S1-L	104
S1-L	106
S1-L	117
S1-L	141
S1-L	160
S1-L	215
S1-L	216
S2-D	22
S2-D	25
S2-D	26
S2-D	27
S2-D	29
S2-D	30
S2-D	30
S2-D	31
S2-D	31
S2-D	35
S2-D	37
S2-D	37
S2-D	38
S2-D	39
S2-D	40
S2-D	43
S2-D	43
S2-D	48
S2-D	51
S2-D	53
S2-D	54
S2-D	54
S2-D	55
S2-D	55
S2-D	59
S2-D	60
S2-D	60
S2-D	64
S2-D	64
S2-D	68
S2-D	69
S2-D	69
S2-D	73
S2-D	76
S2-D	77
S2-D	78
S2-D	78
S2-D	78
S2-D	79
S2-D	80
S2-D	81
S2-D	83
S2-D	85
S2-D	86
S2-D	86
S2-D	86
S2-D	88
S2-D	88
S2-D	89
S2-D	89
S2-D	90
S2-D	90
S2-D	90
S2-D	90
S2-D	90
S2-D	90
S2-D	91
S2-D	93
S2-D	95
S2-D	99
S2-D	99
S2-D	99
S2-D	100
S2-D	100
S2-D	101
S2-D	102
S2-D	103
S2-D	103
S2-D	104
S2-D	104
S2-D	105
S2-D	106
S2-D	107
S2-D	111
S2-D	111
S2-D	111
S2-D	120
S2-D	125
S2-D	129
S2-D	132
S2-D	132
S2-D	141
S2-D	143
S2-D	149
S2-D	151
S2-D	157
S2-D	157
S2-D	157
S2-D	157
S2-D	157
S2-D	159
S2-D	160
S2-D	169
S2-D	175
S2-L	20
S2-L	27
S2-L	29
S2-L	30
S2-L	30
S2-L	31
S2-L	39
S2-L	39
S2-L	40
S2-L	40
S2-L	40
S2-L	40
S2-L	41
S2-L	41
S2-L	41
S2-L	41
S2-L	43
S2-L	45
S2-L	49
S2-L	51
S2-L	55
S2-L	59
S2-L	59
S2-L	59
S2-L	59
S2-L	61
S2-L	61
S2-L	62
S2-L	64
S2-L	67
S2-L	67
S2-L	68
S2-L	71
S2-L	72
S2-L	73
S2-L	74
S2-L	77
S2-L	78
S2-L	78
S2-L	78
S2-L	79
S2-L	79
S2-L	79
S2-L	79
S2-L	80
S2-L	80
S2-L	84
S2-L	84
S2-L	85
S2-L	85
S2-L	86
S2-L	86
S2-L	87
S2-L	92
S2-L	92
S2-L	97
S2-L	98
S2-L	98
S2-L	98
S2-L	100
S2-L	100
S2-L	101
S2-L	102
S2-L	102
S2-L	103
S2-L	103
S2-L	104
S2-L	105
S2-L	105
S2-L	109
S2-L	111
S2-L	117
S2-L	118
S2-L	118
S2-L	118
S2-L	127
S2-L	128
S2-L	132
S2-L	132
S2-L	137
S2-L	138
S2-L	138
S2-L	138
S2-L	139
S2-L	155
S2-L	158
S2-L	167
S2-L	222
S2-L	255
S3-D	23
S3-D	24
S3-D	29
S3-D	29
S3-D	31
S3-D	33
S3-D	34
S3-D	37
S3-D	39
S3-D	39
S3-D	39
S3-D	39
S3-D	39
S3-D	39
S3-D	40
S3-D	40
S3-D	40
S3-D	41
S3-D	42
S3-D	42
S3-D	42
S3-D	42
S3-D	42
S3-D	43
S3-D	45
S3-D	46
S3-D	47
S3-D	47
S3-D	49
S3-D	49
S3-D	49
S3-D	49
S3-D	50
S3-D	50
S3-D	50
S3-D	52
S3-D	52
S3-D	53
S3-D	54
S3-D	55
S3-D	55
S3-D	56
S3-D	57
S3-D	59
S3-D	59
S3-D	59
S3-D	59
S3-D	59
S3-D	59
S3-D	59
S3-D	59
S3-D	59
S3-D	60
S3-D	60
S3-D	60
S3-D	60
S3-D	60
S3-D	61
S3-D	61
S3-D	61
S3-D	62
S3-D	63
S3-D	64
S3-D	66
S3-D	66
S3-D	66
S3-D	67
S3-D	67
S3-D	69
S3-D	69
S3-D	71
S3-D	72
S3-D	73
S3-D	78
S3-D	78
S3-D	79
S3-D	80
S3-D	80
S3-D	80
S3-D	82
S3-D	83
S3-D	91
S3-D	92
S3-D	92
S3-D	117
S3-D	118
S3-D	144
S3-D	149
S3-D	668
S3-L	32
S3-L	37
S3-L	42
S3-L	43
S3-L	49
S3-L	49
S3-L	49
S3-L	50
S3-L	50
S3-L	50
S3-L	51
S3-L	52
S3-L	52
S3-L	54
S3-L	58
S3-L	58
S3-L	59
S3-L	59
S3-L	59
S3-L	60
S3-L	60
S3-L	60
S3-L	60
S3-L	60
S3-L	61
S3-L	61
S3-L	61
S3-L	62
S3-L	63
S3-L	63
S3-L	63
S3-L	64
S3-L	64
S3-L	65
S3-L	66
S3-L	66
S3-L	66
S3-L	67
S3-L	68
S3-L	68
S3-L	68
S3-L	69
S3-L	69
S3-L	69
S3-L	69
S3-L	69
S3-L	70
S3-L	70
S3-L	71
S3-L	71
S3-L	71
S3-L	71
S3-L	72
S3-L	72
S3-L	73
S3-L	73
S3-L	73
S3-L	73
S3-L	74
S3-L	74
S3-L	75
S3-L	76
S3-L	77
S3-L	77
S3-L	78
S3-L	80
S3-L	80
S3-L	80
S3-L	80
S3-L	80
S3-L	81
S3-L	82
S3-L	82
S3-L	82
S3-L	84
S3-L	86
S3-L	88
S3-L	88
S3-L	88
S3-L	88
S3-L	89
S3-L	89
S3-L	90
S3-L	91
S3-L	92
S3-L	92
S3-L	98
S3-L	99
S3-L	114
S4-D	40
S4-D	61
S4-D	50
S4-D	50
S4-D	67
S4-D	54
S4-D	40
S4-D	50
S4-D	40
S4-D	62
S4-D	49
S4-D	40
S4-D	63
S4-D	45
S4-D	32
S4-D	45
S4-D	59
S4-D	43
S4-D	49
S4-D	25
S4-D	51
S4-D	49
S4-D	30
S4-D	56
S4-D	50
S4-D	59
S4-D	56
S4-D	45
S4-D	51
S4-D	59
S4-D	87
S4-D	40
S4-D	40
S4-D	49
S4-D	64
S4-D	50
S4-D	69
S4-D	60
S4-D	64
S4-D	59
S4-D	60
S4-D	49
S4-D	39
S4-D	52
S4-D	39
S4-D	69
S4-D	49
S4-D	59
S4-D	102
S4-D	91
S4-D	40
S4-D	42
S4-D	53
S4-D	59
S4-D	30
S4-D	39
S4-D	41
S4-D	41
S4-D	59
S4-D	53
S4-D	60
S4-D	40
S4-D	61
S4-D	49
S4-D	80
S4-D	49
S4-D	41
S4-D	59
S4-D	70
S4-D	62
S4-D	61
S4-D	75
S4-D	90
S4-D	78
S4-D	78
S4-D	75
S4-D	83
S4-D	78
S4-D	78
S4-D	59
S4-D	60
S4-D	98
S4-D	81
S4-D	79
S4-D	39
S4-D	47
S4-D	46
S4-D	79
S4-D	100
S4-D	71
S4-L	96
S4-L	81
S4-L	117
S4-L	140
S4-L	68
S4-L	107
S4-L	99
S4-L	82
S4-L	54
S4-L	64
S4-L	64
S4-L	192
S4-L	149
S4-L	98
S4-L	98
S4-L	102
S4-L	59
S4-L	148
S4-L	132
S4-L	118
S4-L	81
S4-L	106
S4-L	102
S4-L	76
S4-L	94
S4-L	108
S4-L	81
S4-L	102
S4-L	95
S4-L	125
S4-L	153
S4-L	83
S4-L	137
S4-L	155
S4-L	78
S4-L	157
S4-L	82
S4-L	99
S4-L	82
S4-L	59
S4-L	66
S4-L	81
S4-L	64
S4-L	46
S4-L	137
S4-L	59
S4-L	136
S4-L	78
S4-L	91
S4-L	125
S4-L	117
S4-L	72
S4-L	59
S4-L	66
S4-L	89
S4-L	118
S4-L	72
S4-L	149
S4-L	125
S4-L	59
S4-L	81
S4-L	59
S4-L	87
S4-L	122
S4-L	145
S4-L	122
S4-L	99
S4-L	91
S4-L	79
S4-L	79
S4-L	78
S4-L	129
S4-L	85
S4-L	76
S4-L	75
S4-L	88
S4-L	65
S4-L	50
S4-L	79
S4-L	59
S4-L	99
S4-L	105
S4-L	85
S4-L	95
S4-L	92
S4-L	58
S4-L	70
S4-L	65
S4-L	80
S4-L	89
S5-D	44
S5-D	64
S5-D	68
S5-D	69
S5-D	71
S5-D	71
S5-D	71
S5-D	74
S5-D	76
S5-D	78
S5-D	78
S5-D	78
S5-D	79
S5-D	85
S5-D	87
S5-D	90
S5-D	98
S5-D	98
S5-D	105
S5-D	107
S5-D	109
S5-D	111
S5-D	117
S5-D	118
S5-D	122
S5-D	138
S5-D	139
S5-D	140
S5-D	141
S5-D	145
S5-L	45
S5-L	45
S5-L	46
S5-L	46
S5-L	47
S5-L	48
S5-L	48
S5-L	51
S5-L	54
S5-L	55
S5-L	62
S5-L	62
S5-L	67
S5-L	67
S5-L	67
S5-L	69
S5-L	69
S5-L	74
S5-L	75
S5-L	75
S5-L	78
S5-L	78
S5-L	78
S5-L	78
S5-L	78
S5-L	79
S5-L	79
S5-L	80
S5-L	80
S5-L	81
S5-L	83
S5-L	83
S5-L	83
S5-L	83
S5-L	84
S5-L	87
S5-L	91
S5-L	91
S5-L	98
S5-L	99
S5-L	100
S5-L	118
S5-L	118
S5-L	121
S5-L	122
S5-L	129
S5-L	141
S5-L	141
S5-L	155
S5-L	157
S5-L	157
S5-L	157
S5-L	157
S5-L	157
S5-L	159
S5-L	159
S5-L	160
S5-L	160
S5-L	163
S5-L	165
S5-L	173
S5-L	181
S5-L	198
S5-L	199
S5-L	201
S5-L	204
S5-L	208
S5-L	210
S5-L	213
S5-L	222
S5-L	239
S5-L	243
S5-L	247
S5-L	275
